# Supplementary material for: Large Language Models for Accurate Mental Health Screening: Identifying Clinical Phenotypes in ED Healthcare Workers
Source: Research Square preprint supplement (doi:10.21203/rs.3.rs-7087333/v1), 2025-07-18
Supplement: Supplementary file 1 [file f859a49412f5bd476c0e5db4.docx]

**SUPPLEMENTARY MATERIALS**

**S1.  Evaluation of a best-fitting model for clustering analysis using a *k*-means algorithm based on pre-identified and selection indicators.**

| **N Clusters** | **Silhouette Score** | **Davies-Bouldin** | **Calinski-Harabasz** | **Dunn-Index** | **Assessment count per cluster** |
| --- | --- | --- | --- | --- | --- |
| **2** | **0.245** | **1.627** | **88.541** | **0.198** | Cluster 0: 99  Cluster 1: 155 |
| **3** | 0.178 | 2.028 | 65.927 | 0.176 | Cluster 0: 86  Cluster 1: 119  Cluster 2: 49 |
| **4** | 0.171 | 2.103 | 51.571 | 0.226 | Cluster 0: 41  Cluster 1: 115  Cluster 2: 41  Cluster 3: 57 |
| **5** | 0.156 | 2.392 | 41.284 | 0.238 | Cluster 0: 19  Cluster 1: 112  Cluster 2: 29  Cluster 3: 46  Cluster 4: 48 |

Bold numbers present the best-fitted model according to the pre-identified and selection indicators.

**Elbow point for the 2-cluster solution as a best-fitted model.** Using the Elbow Method, plotted by the within-cluster sum of squares (WCSS) against the number of clusters to identify the ‘elbow point’, we display here that the slope rate of decrease is reduced the most and is sharpest until 2 clusters.

**S2.  Example prompt of work-related narrative used in the Large Language Model (LMM).**

*TASK*

*You will be provided with a transcription of an interview conducted with a healthcare worker in a New York Emergency Department (ED) who responded to the question: 'What are your expectations about your role and your work as an ED clinician in the future?'. Your task is to analyze the transcription and assign the healthcare worker to one of two clinical phenotypes based on their mental health symptom levels. Healthcare workers consist of e.g., nurses, PAs, technicians, and physicians, with diverse ethnic backgrounds, and they may use specific New York slang.*

---

*CLINICAL PHENOTYPES*

Group 0: High-Symptom Phenotype

- Key Features: High-to-moderate burnout, moderate depressive, or PTSD symptoms.

- Symptoms to Look For: Direct or subtle signs of exhaustion, emotional numbing, fatigue, feeling overwhelmed, sleep problems, physical changes, or cognitive issues like trouble focusing.

- Examples:

- Frequent mentions of trouble sleeping, body aches, or feeling emotionally detached from their work.

- Difficulty managing/coping with ED stress, uncertainty about their ability to continue in their role, or doubts about their future, or seeking a different job because of high burnout rates.

- Optimism paired with references to coping mechanisms or downplaying challenges as 'normal' for the job.

- Inconsistent statements, such as expressing confidence but revealing doubts about their energy, focus, or ability to handle stress.

- Mentions of especially stressful times, like working during COVID-19

- Uses more neutral and negative words.

Group 1: Low-Symptom Phenotype

- Key Features: Mild or absent burnout, depression, or PTSD symptoms.

- Symptoms to Look For: Acknowledgment of challenges without signs of internal distress or doubts about continuing in their role.

- Examples:

- Clear and coherent reflections on their future, often emphasizing work-life balance, job satisfaction, and control over responsibilities.

- A positive or neutral outlook, with the ability to discuss past stressors in a balanced way without lingering negativity.

- Fatigue may be mentioned as a temporary reaction to specific events, rather than an ongoing concern.

- Uses more neutral and positive words.

---

*FURTHER INFORMATION*

Your goal is to identify healthcare workers who belong to Group 0 (High-Symptom Phenotype), as the model is being used for mental health screening purposes. You will be penalized more if you classify a healthcare worker with high symptoms of burnout, depression, or PTSD into group 1: Low-Symptom Phenotype.

Response Format:

Profile: [Predicted Profile]

Key Indicators: [Burnout symptoms, depressive symptoms, PTSD symptoms, etc.]

Explanation: [Brief reasoning based on the narrative]

---

*NARRATIVE*

Future Expectations: 'What are your expectations about your role and your work as an ED clinician in the future?’

Response: ****HCWs’ narrative transcript here****

**S3. Llama3-8B-Instruct implementation details**

To improve efficiency, we applied 4-bit quantization and enabled mixed precision (bf16) with the Accelerate (0.31.0) library. The model and tokenizer were prepared with torch.float32 precision for weight handling, ensuring faster computation without sacrificing accuracy.

**S4. Estimated mean total- and domain scores of the clinical phenotype profiles of the best-fitting model with regards to their participant characteristics, for the LLM participant sample.**

|  | **High-Symptom Phenotype**  **(n=56 assessments)** | **Low-Symptom Phenotype**  **(n=70 assessments)** |
| --- | --- | --- |
| Participants  **MENTAL HEALTH**  Burnout1  Personal Accomplishment  *Probable burnout (cut-off ≤ 12)*  Emotional Exhaustion  *Probable burnout (cut-off ≥ 11)*  Depersonalization  *Probable burnout (cut-off ≥ 7)*    Depressive symptoms2  *Probable depression (cut-off ≥ 20)*    PTSD symptoms3  Cluster B Intrusion  Cluster C Avoidance  Cluster D Negative Cognitions and Mood  Cluster E Arousal and Reactivity Alterations  Total score  *Probable PTSD (cut-off ≥ 31)*    Assessments  Baseline  6-month follow-up | 42  13.4 (2.4)  18 (32.1%)  12.0 (3.2)  39 (69.6%)  8.9 (4.1)  40 (71.4%)  8.6 (4.0)  0  6.2 (3.8)  3.2 (2.1)  9.9 (5.0)  7.5 (3.9)  26.8 (10.2)  18 (32.1%)  40 (71.4%)  16 (28.6%) | 52  14.0 (3.2)  19 (27.1%)  7.0 (4.3)  18 (25.7%)  4.3 (3.9)  20 (28.6%)  2.0 (2.0)  0  1.4 (1.5)  0.8 (1.2)  2.1 (2.5)  1.9 (1.9)  6.2 (5.4)  0  48 (68.6%)  22 (31.4%) |
| **DEMOGRAPHIC INFORMATION**  Age (years)    Sex at birth  Female  Male  Sexual orientation  Straight  Gay  Lesbian  Bisexual  Something else  Prefer not to say  Marital Status  Partner  Single  Separated  Divorced  Declined to respond  Race  White  Black or African American  Asian  Middle Eastern or North African  American Indian/Native American  Multiracial  Other  Unknown  Declined to respond  Ethnicity  Hispanic or Latino  Non-Hispanic or -Latino  Declined to respond  Education level  High school diploma/GED  Trade school/Vocational school  (Some) College  College graduate  Graduate school/Professional school  Declined to respond | 34.2 (7.3)  28 (66.7%)  14 (33.3%)  33 (78.6%)  1 (2.4%)  0  5 (11.9%)  1 (2.4%)  2 (4.8%)  14 (33.3%)  24 (57.1%)  2 (4.8%)  2 (4.8%)  0  17 (40.5%)  7 (16.7%)  8 (19.0%)  1 (2.4%)  0  2 (4.8%)  2 (4.8%)  0  5 (11.9%)  10 (23.8%)  30 (71.4%)  2 (4.8%)  0  0  2 (4.8%)  18 (42.9%)  22 (52.4%)  0 | 35.0 (9.4)  28 (53.9%)  24 (46.1%)  46 (88.5%)  2 (3.9%)  1 (1.9%)  1 (1.9%)  2 (3.8%)  0  18 (34.6%)  31 (59.6%)  0  3 (5.8%)  0  21 (40.4%)  12 (23.1%)  12 (23.1%)  0  1 (1.9%)  5 (9.6%)  0  0  1 (1.9%)  1 (1.9%)  49 (94.2%)  1 (1.9%)  0  0  1 (1.9%)  12 (23.1%)  39 (75.0%)  0 |
| **WORK-RELATED MEASURES**  Current Position11  Faculty physician  Resident physician  Physician assistant  Nurse practitioner  Licensed registered nurse  Social worker  Other  Years in current position4 | 3 (7.1%)  12 (28.6%)  2 (4.8%)  2 (4.8%)  20 (47.6%)  0  3 (7.1%)  4.8 (4.3) | 9 (17.3%)  20 (38.5%)  3 (5.8%)  0  13 (25.0%)  0  7 (13.5%)  4.3 (5.5) |
| **BEHAVIORAL MEASURES**5  Drinks per week  Cigarettes per day | 2.1 (3.7)6  0.2 (0.8)6 | 2.6 (3.2)7  0 (0)7 |

Scores are displayed as raw mean(SD). 1Measured with domain scores on the MBI-9: Maslach Burnout Inventory, range 0-18; 2Measured with total scores on the PHQ-8: Patient Health Questionnaire, total range 0-24; 3Measured with total and subdomain scores on the PCL5: PTSD Checklist for DSM5, total range 0-80; 4Measured during baseline assessment; 5Measured with Smoking Alcohol Intake Questionnaire during baseline assessment; 6n=2 participant missing; 7n=4 participants missing.

**S5. Examples of key indicators extracted from the narrative by the LLM used for reasoning to classify a participant into the High-Symptom or Low-Symptom Phenotype.**

| **Phenotype** | **Reasoning** |
| --- | --- |
| High-Symptom Phenotype | "Profile: Group 0: High-Symptom Phenotype  Key Indicators:  *Burnout symptoms: The respondent mentions feeling overwhelmed and uncertain about their ability to continue in their role, which is a key feature of burnout.  *Depressive symptoms: The respondent expresses a sense of disappointment and frustration with their current situation, which may be indicative of mild depressive symptoms.  *PTSD symptoms: The respondent mentions feeling anxious and overwhelmed by the demands of their job, which could be a sign of PTSD symptoms.  Explanation: The respondent's narrative suggests that they are struggling with feelings of burnout and uncertainty about their role in the ED. They express a desire for more control over their work and a sense of job satisfaction, which may be a sign of mild depressive symptoms. The respondent also mentions feeling overwhelmed by the demands of their job, which could be a sign of PTSD symptoms. Overall, the respondent's narrative suggests that they are experiencing high levels of burnout and may be at risk for developing more severe mental health symptoms if they do not receive support and resources to manage their stress." |
| Low-Symptom Phenotype | "Profile: Group 1: Low-Symptom Phenotype  Key Indicators: Mild burnout symptoms, no depressive or PTSD symptoms  Explanation: The healthcare worker's narrative suggests a sense of confidence and optimism about their role and future expectations. They express a desire to lead and mentor new nurses and doctors, and to help them develop a broader perspective on patient care. The worker also mentions their own personal growth and development, having reached their highest potential as a registered nurse and nurse practitioner. The tone is positive and reflective, with no signs of emotional distress, fatigue, or doubts about their ability to continue in their role. The worker's language is clear and coherent, with a focus on their strengths and abilities rather than their weaknesses. Overall, the narrative suggests a healthcare worker who is well-adjusted and motivated, with a strong sense of purpose and direction." |

**S6. Statistical analysis approach of comparing demographics, mental health, work-related measures, and behavioral measures between clinical phenotype profiles (Table 2 within manuscript) and posthoc test results for the measures that differed significantly between profiles for the sample used in the clinical phenotypes.**

Statistical analysis approach:

As data with regards to demographics, mental health, work-related measures, and behavioral measures was included for both baseline and 6-month follow-up assessments for some participants for the clustering analysis, we performed Linear Mixed Models (LMM) with Restricted Maximum Likelihood (REML) to assess differences on mental health measures between the final clinical phenotype profiles. Model-fit was evaluated based on criteria -2 Log Likelihood (-2 LL), Akaike Information Criterion (AIC) and Bayesian Information Criterion (BIC), with lower values indicating best-fitted model using models with covariance structure Diagonal, Unstructured, and first-order autoregressive covariance structure (AR1). Best-fitted model was Diagonal for all measures.

For continuous and categorical demographical information, independent samples T-test, Pearson Chi-Square and Likelihood Ratio Chi-Square tests were performed.

Posthoc test results for the measures that differed significantly between profiles:

|  | **Fixed Effects of Profiles** | | | | **Posthoc test statistics and interpretation**  High-Symptom vs.  Low-Symptom Phenotypes |
| --- | --- | --- | --- | --- | --- |
| **Numerator df** | **Denominator df** | **F** | ***p*** |
| **MENTAL HEALTH**  Burnout1 |  |  |  |  |  |
| Emotional Exhaustion (EE) | 1 | 244.25 | 107.58 | <.001 | **B = 5.05, 95% CI 4.09-6.00, SE = 0.49, t = 10.37, p<.001**: indicating higher EE scores in the High- vs. Low-Symptom Phenotype |
| Depersonalization (DEP) | 1 | 251.52 | 67.46 | <.001 | **B = 4.02, 95% CI 3.06-4.99, SE = 0.49, t = 8.21, p <.001**: indicating higher DEP scores in the High- vs. Low-Symptom Phenotype |
| Depressive symptoms2  Total score | 1 | 225.54 | 274.64 | <.001 | **B = 5.95, 95% CI 5.24-6.66, SE = 0.36, t = 16.57, p <.001**: indicating higher depressive symptom scores in the High- vs. Low-Symptom Phenotype |
| PTSD symptoms3  Cluster B Intrusion | 1 | 212.57 | 145.06 | <.001 | **B = 4.54, 95% CI 3.80-5.28, SE = 0.38, t = 12.04, p <.001**: indicating higher PTSD-related Intrusion scores in the High- vs. Low-Symptom Phenotype |
| Cluster C Avoidance | 1 | 200.10 | 121.09 | <.001 | **B = 2.34, 95% CI 1.92-2.76, SE = 0.21, t = 11.00, p <.001**: indicating higher PTSD-related Avoidance scores in the High- vs. Low-Symptom Phenotype |
| Cluster D Negative Cognitions and Mood | 1 | 226.47 | 208.19 | <.001 | **B = 6.80, 95% CI 5.87-7.73, SE = 0.47, t = 14.43, p <.001**: indicating higher PTSD-related Negative Mood and Cognition scores in the High- vs. Low-Symptom Phenotype |
| Cluster E Arousal and Reactivity Alterations | 1 | 226.75 | 177.29 | <.001 | **B = 5.06, 95% CI 4.31-5.81, SE = 0.38, t = 13.32, p<.001**: indicating higher PTSD-related Hyperarousal and -reactivity scores in the High- vs. Low-Symptom Phenotype |
| Total score | 1 | 215.83 | 323.91 | <.001 | **B = 18.96, 95% CI 16.88-21.04, SE = 1.05, t = 18.00, p< .001**: indicating higher PTSD symptom scores in the High- vs. Low-Symptom Phenotype |

1Measured with domain scores on the MBI-9: Maslach Burnout Inventory, range 0-18; 2Measured with total scores on the PHQ-8: Patient Health Questionnaire, total range 0-24; 3Measured with total and subdomain scores on the PCL5: PTSD Checklist for DSM5, total range 0-80.
